# Supplementary material for: Assembly of high-symmetry silver(i) alkyl-1,3-diynyl cluster complexes via core transformation
Source: Royal Society of Chemistry journal article supplement (doi:10.1039/c7dt03406g), 2017-01-01
Supplement: c7dt03406g1.pdf [file c7dt03406g1.pdf]

## Supporting Information

### **Assembly of high-symmetry silver(I) alkyl-1,3-diynyl cluster complexes via core transformation**

Sam C. K. Hau,<sup>a,b</sup> Thomas C. W. Mak<sup>a\*</sup>

*<sup>a</sup>Department of Chemistry and Center of Novel Functional Molecules, The Chinese University of Hong Kong, Shatin, New Territories, Hong Kong SAR, People's Republic of China*

*<sup>b</sup>Department of Chemistry, Hong Kong Baptist University, Kowloon, Hong Kong SAR, People's Republic of China*

\*E-mail: [tcwmak@cuhk.edu.hk](mailto:tcwmak@cuhk.edu.hk)

## 1. X-ray crystallography

Selected crystals were used for intensity data collection on a Bruker AXS Kappa Apex II Duo diffractometer at 173K using frames of oscillation range  $0.3^\circ$ , with  $2^\circ < \theta < 28^\circ$ . An empirical absorption correction was applied using the SADABS program.<sup>[1]</sup> The structures were solved by the direct method and refined by full-matrix least-squares on  $F^2$  using the SHELXTL program package.<sup>[2]</sup>

The crystal structures of synthetic precursors  $[(RC\equiv C-C\equiv C)Ag]_4(PPh_3)_4$  ( $R = iPr$ ,  $tBu$ ,  $chx$  and  $Ph$ ),  $[(chxC\equiv C-C\equiv C-C\equiv C)Ag]_4(PPh_3)_4$  and complexes **1-3** were determined by single-crystal X-ray analysis. The crystal data of complexes **7** and **8** and refinement parameters are presented in Table S1.

**Table S1.** Crystallographic data and structure refinement parameters of synthetic precursors **7** and **8**.

| Complex                       | $[(PhC\equiv C-C\equiv C)Ag]_4(PPh_3)_4 \cdot 1.5MeCN$ ( <b>7</b> ) | $[(chxC\equiv C-C\equiv C-C\equiv C)Ag]_4(PPh_3)_4 \cdot MeOH \cdot 5H_2O$ ( <b>8</b> ) |
|-------------------------------|---------------------------------------------------------------------|-----------------------------------------------------------------------------------------|
| Structural Formula            | $C_{230}H_{169}Ag_8N_3P_8$                                          | $C_{121}H_{107}Ag_4O_9P_4$                                                              |
| Formula Wt.                   | 4085.40                                                             | 2260.43                                                                                 |
| Crystal System                | Monoclinic                                                          | Monoclinic                                                                              |
| Space Group                   | $P2_1/n$                                                            | $P2_1/n$                                                                                |
| $a$ [Å]                       | 16.305(1)                                                           | 16.805(1)                                                                               |
| $b$ [Å]                       | 34.222(2)                                                           | 21.229(3)                                                                               |
| $c$ [Å]                       | 17.656(1)                                                           | 16.900(1)                                                                               |
| $\alpha$ [Å]                  | 90.0                                                                | 90.0                                                                                    |
| $\beta$ [Å]                   | 102.069(1)                                                          | 101.531(2)                                                                              |
| $\gamma$ [Å]                  | 90.0                                                                | 90.0                                                                                    |
| $V$ [Å <sup>3</sup> ]         | 9633.8(11)                                                          | 5907.5(12)                                                                              |
| $Z$                           | 2                                                                   | 2                                                                                       |
| $\rho_c$ [gcm <sup>-3</sup> ] | 1.408                                                               | 1.271                                                                                   |
| $\mu$ [mm <sup>-1</sup> ]     | 0.917                                                               | 0.759                                                                                   |
| $R_1^{[a]}$ ( $I > 2\sigma$ ) | 0.0711                                                              | 0.0971                                                                                  |
| $wR_2^{[b]}$ (all data)       | 0.1347                                                              | 0.2114                                                                                  |
| GOF                           | 1.128                                                               | 1.093                                                                                   |

<sup>[a]</sup>  $R_1 = \Sigma||F_o| - |F_c|| / \Sigma|F_o|$ . <sup>[b]</sup>  $wR_2 = \{\Sigma[w(F_o^2 - F_c^2)^2] / \Sigma[w(F_o^2)^2]\}^{1/2}$ .

\* Space group  $P2_1/n$  is equivalent to standard  $P2_1/c$  by an axial transformation.

## 2. Description of Synthetic Precursors 7 and 8

### $[(\text{PhC}\equiv\text{C}-\text{C}\equiv\text{C})\text{Ag}]_4(\text{PPh}_3)_4 \cdot 1.5\text{MeCN}$ (7)

The cluster core of  $[(\text{PhC}\equiv\text{C}-\text{C}\equiv\text{C})\text{Ag}]_4(\text{PPh}_3)_4$  consists of two nearly isosceles  $\text{Ag}_3$  triangles sharing a common edge, with the resulting parallelogram-like  $\text{Ag}_4$  array consolidated by two pairs of bridging  $\text{chxC}\equiv\text{C}-\text{C}\equiv\text{C}^-$  groups. The  $\text{PPh}_3$  ligands are attached only to the outer  $\text{Ag1}$  and  $\text{Ag3}$  centers (Figure S1). In the cluster molecule, the observed argentophilic  $\text{Ag}\cdots\text{Ag}$  distances range from 2.924(7) to 3.449(8) Å, and the  $\text{Ag2}-\text{Ag1}-\text{Ag4}$ ,  $\text{Ag1}-\text{Ag2}-\text{Ag3}$ ,  $\text{Ag2}-\text{Ag3}-\text{Ag4}$  and  $\text{Ag1}-\text{Ag4}-\text{Ag3}$  angles are  $52.7(1)^\circ$ ,  $130.7(1)^\circ$ ,  $58.9(1)^\circ$  and  $117.4(2)^\circ$ , respectively.

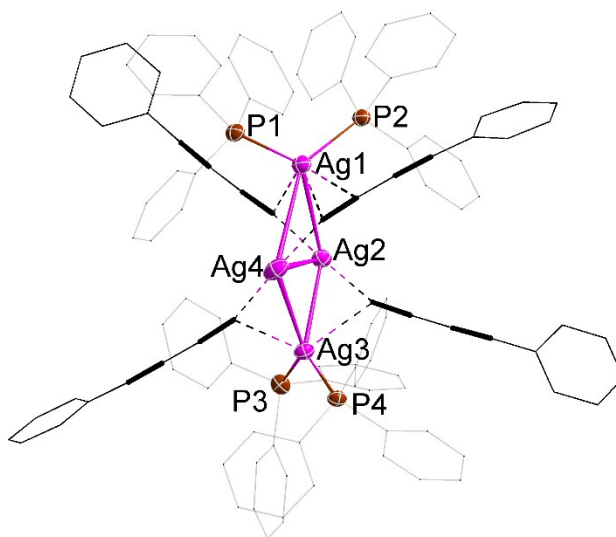

**Figure S1.** Coordination environment of the silver(I) atoms in the discrete molecule  $[(\text{PhC}\equiv\text{C}-\text{C}\equiv\text{C})\text{Ag}]_4(\text{PPh}_3)_4 \cdot 2\text{MeCN}$ . The  $\text{C}\equiv\text{C}$  triple bonds in the aryl-1,3-diynyl ligands are shown as thick rods. Silver atoms are drawn as thermal ellipsoids (50% probability level) with atom labeling. The argentophilic  $\text{Ag}\cdots\text{Ag}$  distances lie in the range 2.70–3.40 Å. Color scheme: purple, silver atoms; broken lines,  $\text{Ag}-\text{C}$  bonds.

### $[(\text{chxC}\equiv\text{C}-\text{C}\equiv\text{C}-\text{C}\equiv\text{C})\text{Ag}]_4(\text{PPh}_3)_4 \cdot 5\text{H}_2\text{O} \cdot \text{MeOH}$ (8)

There are two independent cluster molecules in the

$[(\text{chxC}\equiv\text{C}-\text{C}\equiv\text{C}-\text{C}\equiv\text{C})\text{Ag}]_4(\text{PPh}_3)_4 \cdot 5\text{H}_2\text{O} \cdot \text{MeOH}$  complex. The cluster core of  $[(\text{chxC}\equiv\text{C}-\text{C}\equiv\text{C}-\text{C}\equiv\text{C})\text{Ag}]_4(\text{PPh}_3)_4$  consists of two nearly isosceles  $\text{Ag}_3$  triangles sharing a common edge, with the resulting parallelogram-like  $\text{Ag}_4$  array consolidated by two pairs of bridging  $\text{chxC}\equiv\text{C}-\text{C}\equiv\text{C}-\text{C}\equiv\text{C}^-$  groups, whereas the  $\text{PPh}_3$  ligands are attached only to the outer inversion-related  $\text{Ag1}$  centers (Figure S2). In the cluster molecule, the observed argentophilic  $\text{Ag}\cdots\text{Ag}$  distances range from 2.889(7) to 3.214(8) Å, and the  $\text{Ag2}-\text{Ag1}-\text{Ag2A}$  and  $\text{Ag1}-\text{Ag2}-\text{Ag1A}$  angles are  $55.0(2)^\circ$  and  $124.9(2)^\circ$ , respectively. The methanol molecule (O1) in the lattice is linked with an aqua ligand O5W by a weak hydrogen bond of length 2.84 Å. The remaining aqua ligands are connected together by weak hydrogen bonds ranging from 2.45 to 2.79 Å.

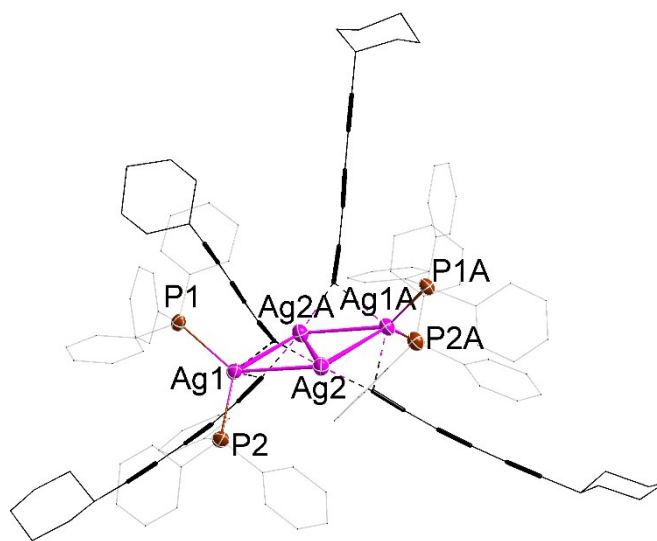

**Figure S2.** Coordination environment of the silver(I) atoms in the discrete molecule  $[(\text{chxC}\equiv\text{C}-\text{C}\equiv\text{C}-\text{C}\equiv\text{C})\text{Ag}]_4(\text{PPh}_3)_4 \cdot 5\text{H}_2\text{O} \cdot \text{MeOH}$ . The  $\text{C}\equiv\text{C}$  triple bonds in the alkyl-1,3,5-triynyl ligands are shown as thick rods. Silver atoms are drawn as thermal ellipsoids (50% probability level) with atom labeling.

3. General procedure to prepare synthetic precursors  $[(RC\equiv C-C\equiv C)Ag]_4(PPh_3)_4$  ( $R = iPr, tBu, chx$  and  $Ph$ ) and  $[(chxC\equiv C-C\equiv C-C\equiv C)Ag]_4(PPh_3)_4$

**CAUTION. Silver ethynides are potentially explosive and should be handled in small amounts with extreme care!**

Polymeric silver ethynide  $[(RC\equiv C-C\equiv C)Ag]_n^3$  (0.1 mmol) was first dissolved in a mixed solution of dichloromethane (3.0 mL) and methanol (0.5 mL) or acetonitrile (0.5 mL); triphenylphosphine (0.1 mmol) was then added with vigorous stirring to achieve complete dissolution. The resulting solution was filtered and left to stand in the dark at room temperature. After two days, colorless block-like crystals of  $[(chxC\equiv C-C\equiv C)Ag]_4(PPh_3)_4 \cdot 2MeOH$  (**4**),  $[(iPrC\equiv C-C\equiv C)Ag]_4(PPh_3)_4$  (**5**),  $[(tBuC\equiv C-C\equiv C)Ag]_4(PPh_3)_4 \cdot 2MeCN$  (**6**) and  $[(PhC\equiv C-C\equiv C)Ag]_4(PPh_3)_4 \cdot 1.5MeCN$  (**7**) were each deposited in *ca.* 80 % yield.  $[(chxC\equiv C-C\equiv C-C\equiv C)Ag]_4(PPh_3)_4 \cdot 5H_2O \cdot MeOH$  (**8**) was similarly prepared and obtained in *ca.* 60% yield.

## References

1. Sheldrick, G. M. *SADABS: Program for Empirical Absorption Correction of Area Detector Data*; University of Göttingen: Göttingen, Germany (**1996**).
2. Sheldrick, G. M. *SHELXTL 5.10 for Windows Structure Determination Software Programs*; Bruker Analytical X-ray Systems, Inc.; Madison, WI, **1997**.
3. Hau, S. C. K.; Cheng, P.-S.; Mak, T. C. W. *J. Am. Chem. Soc.* **2012**, *134*, 2922.

Due to the poor solubility of high weighted complexes in either polar or non-polar organic solvents, the  $^{13}\text{C}$  NMR of some complexes could not be recorded.

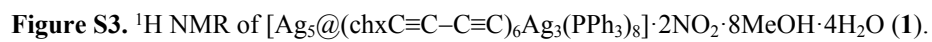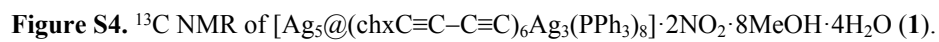

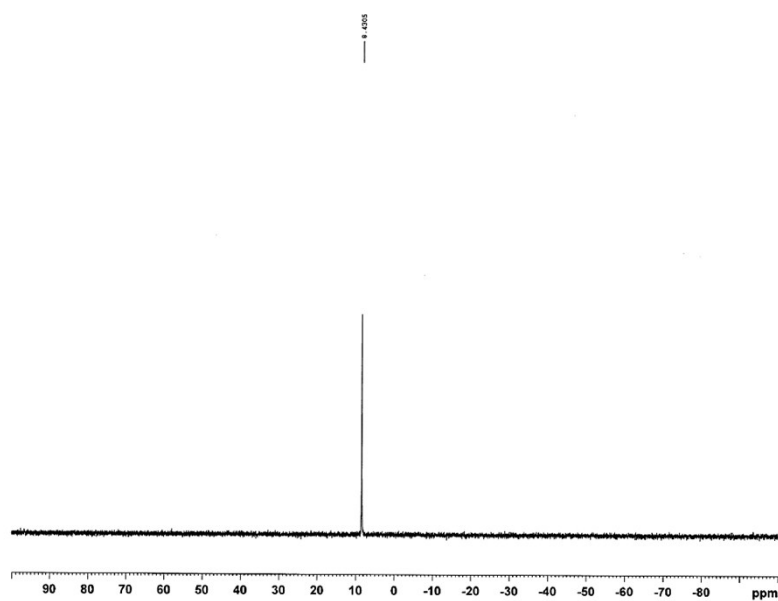

**Figure S5.**  $^{31}\text{P}$  NMR of  $[\text{Ag}_5@(\text{chxC}\equiv\text{C}-\text{C}\equiv\text{C})_6\text{Ag}_3(\text{PPh}_3)_8]\cdot 2\text{NO}_2\cdot 8\text{MeOH}\cdot 4\text{H}_2\text{O}$  (1).

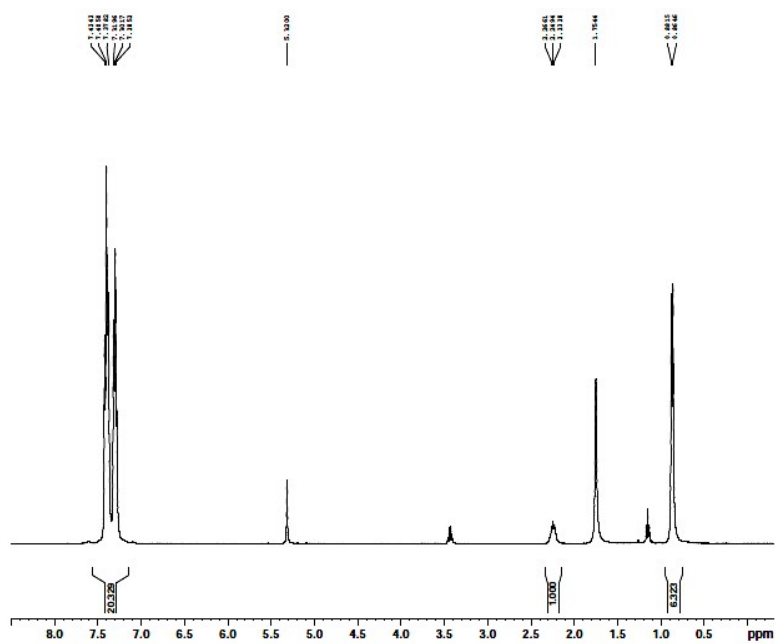

**Figure S6.**  $^1\text{H}$  NMR of  $[\text{Ag}_5@(i\text{PrC}\equiv\text{C}-\text{C}\equiv\text{C})_6\text{Ag}_3(\text{PPh}_3)_8]\cdot 2\text{NO}_3\cdot \text{MeOH}\cdot \text{H}_2\text{O}$  (3).

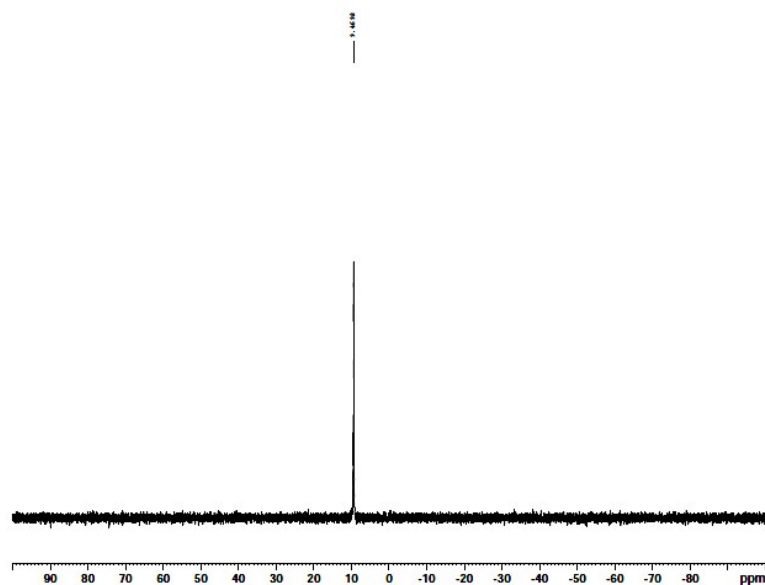

**Figure S7.**  $^{31}\text{P}$  NMR of  $[\text{Ag}_5@(\text{iPrC}\equiv\text{C}-\text{C}\equiv\text{C})_6\text{Ag}_3(\text{PPh}_3)_8]\cdot 2\text{NO}_3\cdot\text{MeOH}\cdot\text{H}_2\text{O}$  (**3**).

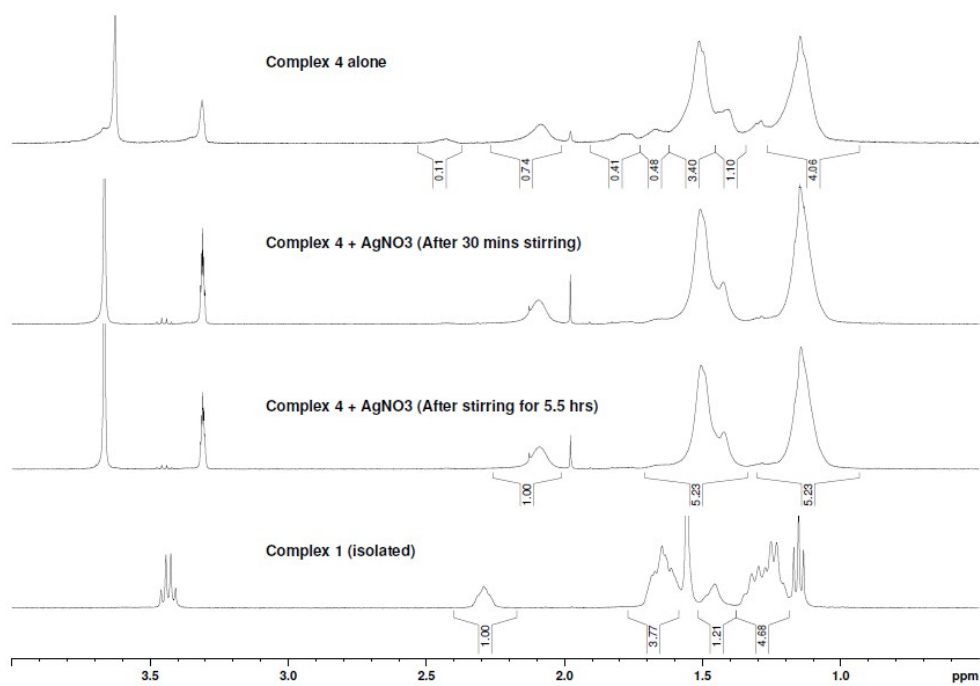

**Figure S8.**  $^1\text{H}$  NMR monitoring for the transformation of **1**.



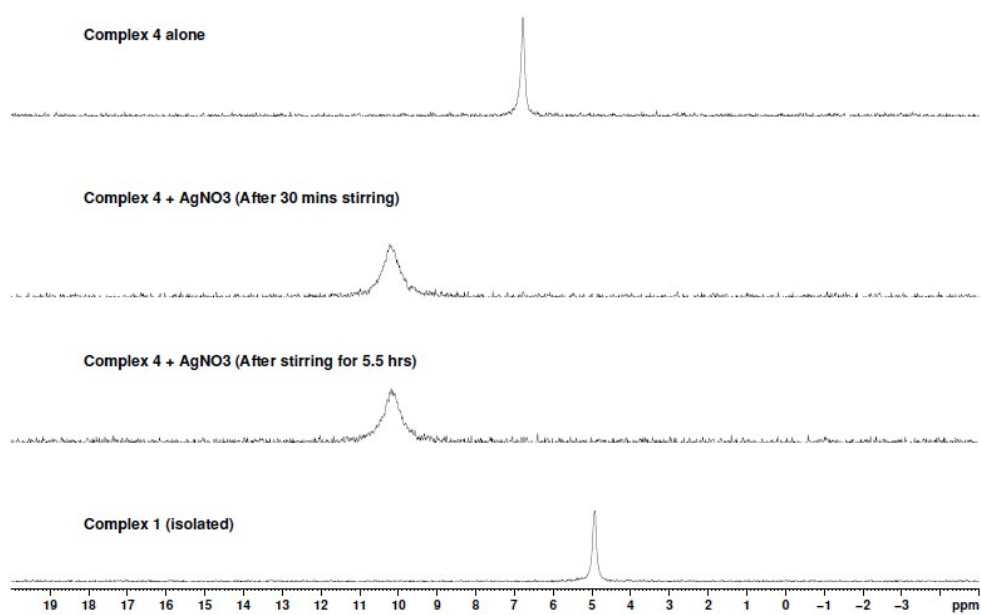

**Figure S9.**  $^{31}\text{P}$  NMR monitoring for the transformation of **1**.
